# Supplementary material for: Synthesis of 3-(quinolin-2-yl)- and 3,6-bis(quinolin-2-yl)-9H-carbazoles
Source: publisher site journal article supplement (doi:10.3762/bjoc.6.108), 2010-10-08
Supplement: Additional file 1 [file 1860-5397-6-108-S1.pdf]

## Supporting Information

for

### Synthesis of 3-(quinolin-2-yl)- and 3,6-bis(quinolin-2-yl)-9*H*-carbazoles

Yang Li and Wentao Gao\*

Address: Institute of Superfine Chemicals, Bohai University, Jinzhou 121000,  
China

Email: Wentao Gao - bhuzh@163.com

\* Corresponding author

<sup>1</sup>H NMR spectra of the title compounds **3a–5c**



Sample: CX5332

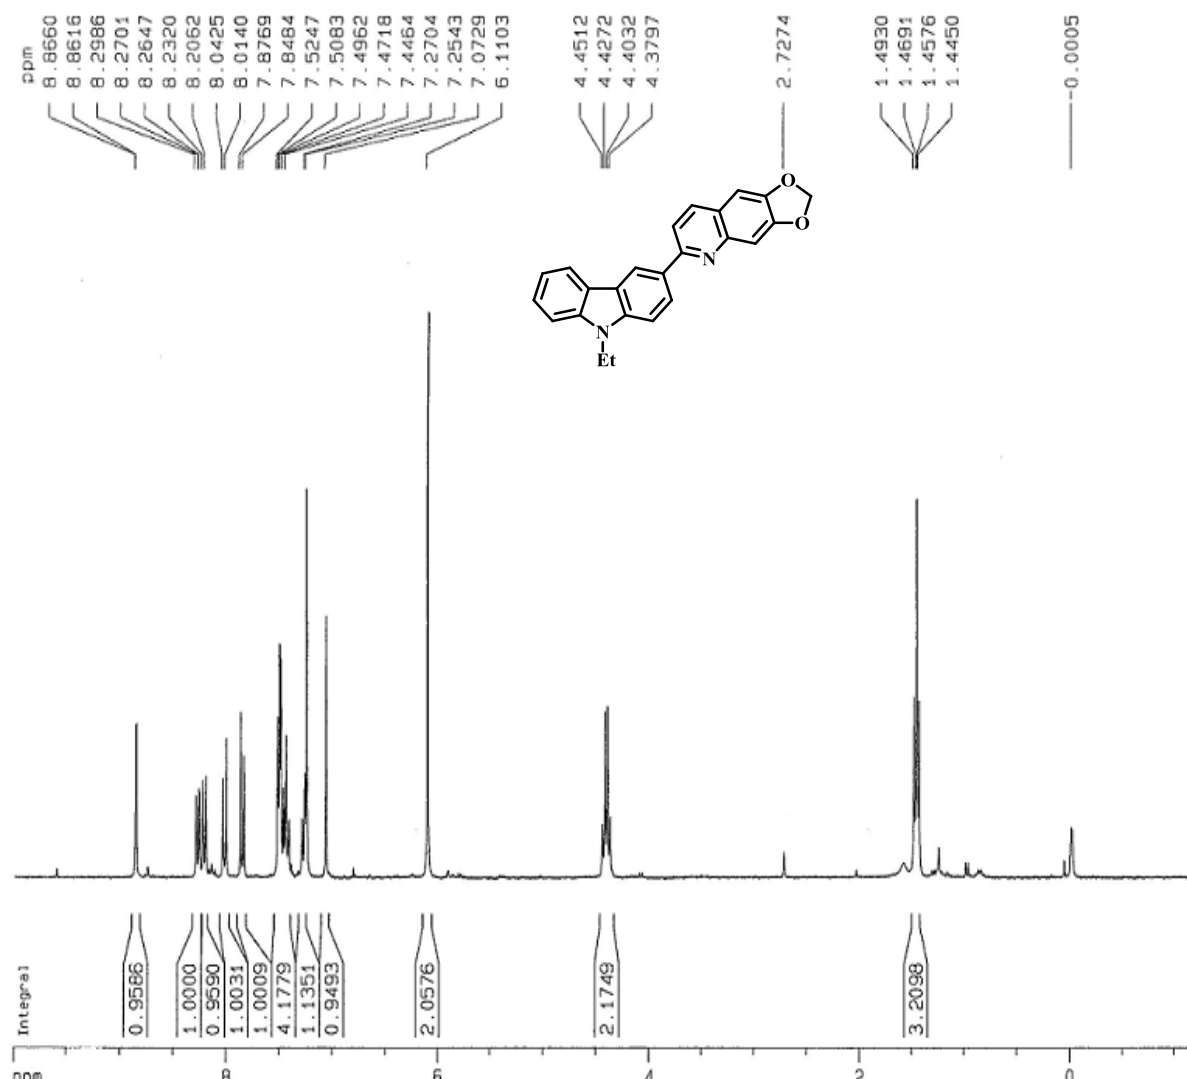

Figure S2:  $^1\text{H}$  NMR spectrum of **3b**.

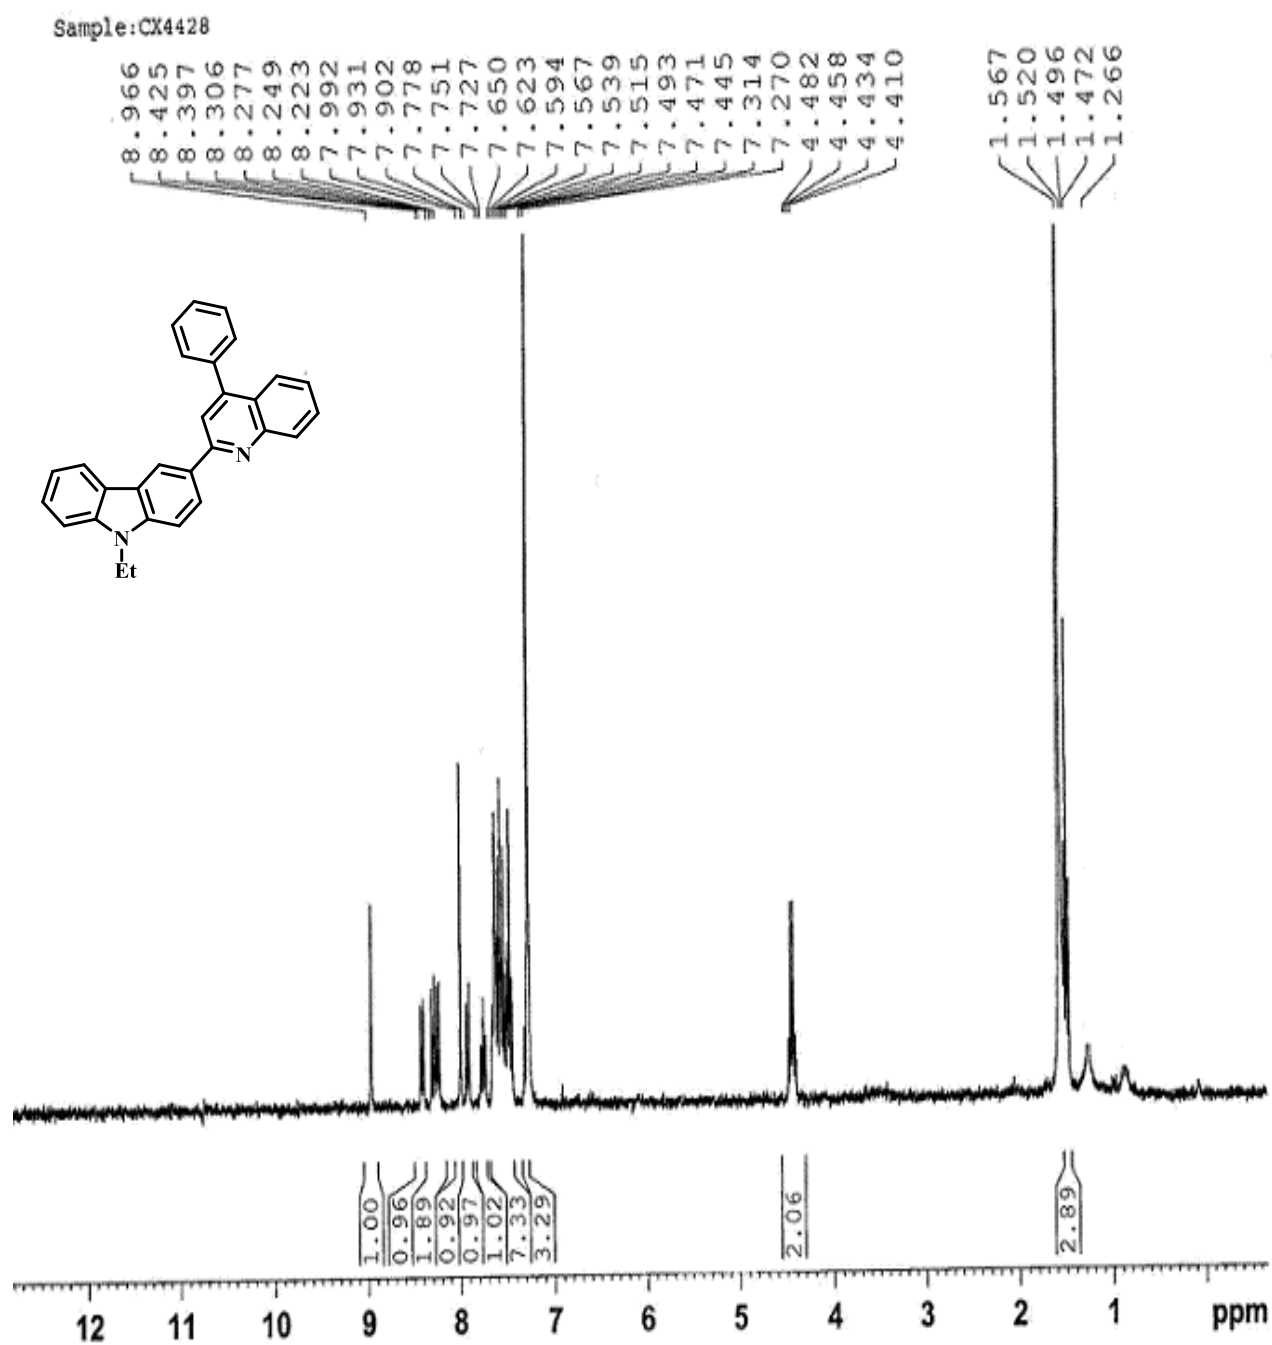

Figure S3:  $^1\text{H}$  NMR spectrum of 3c.

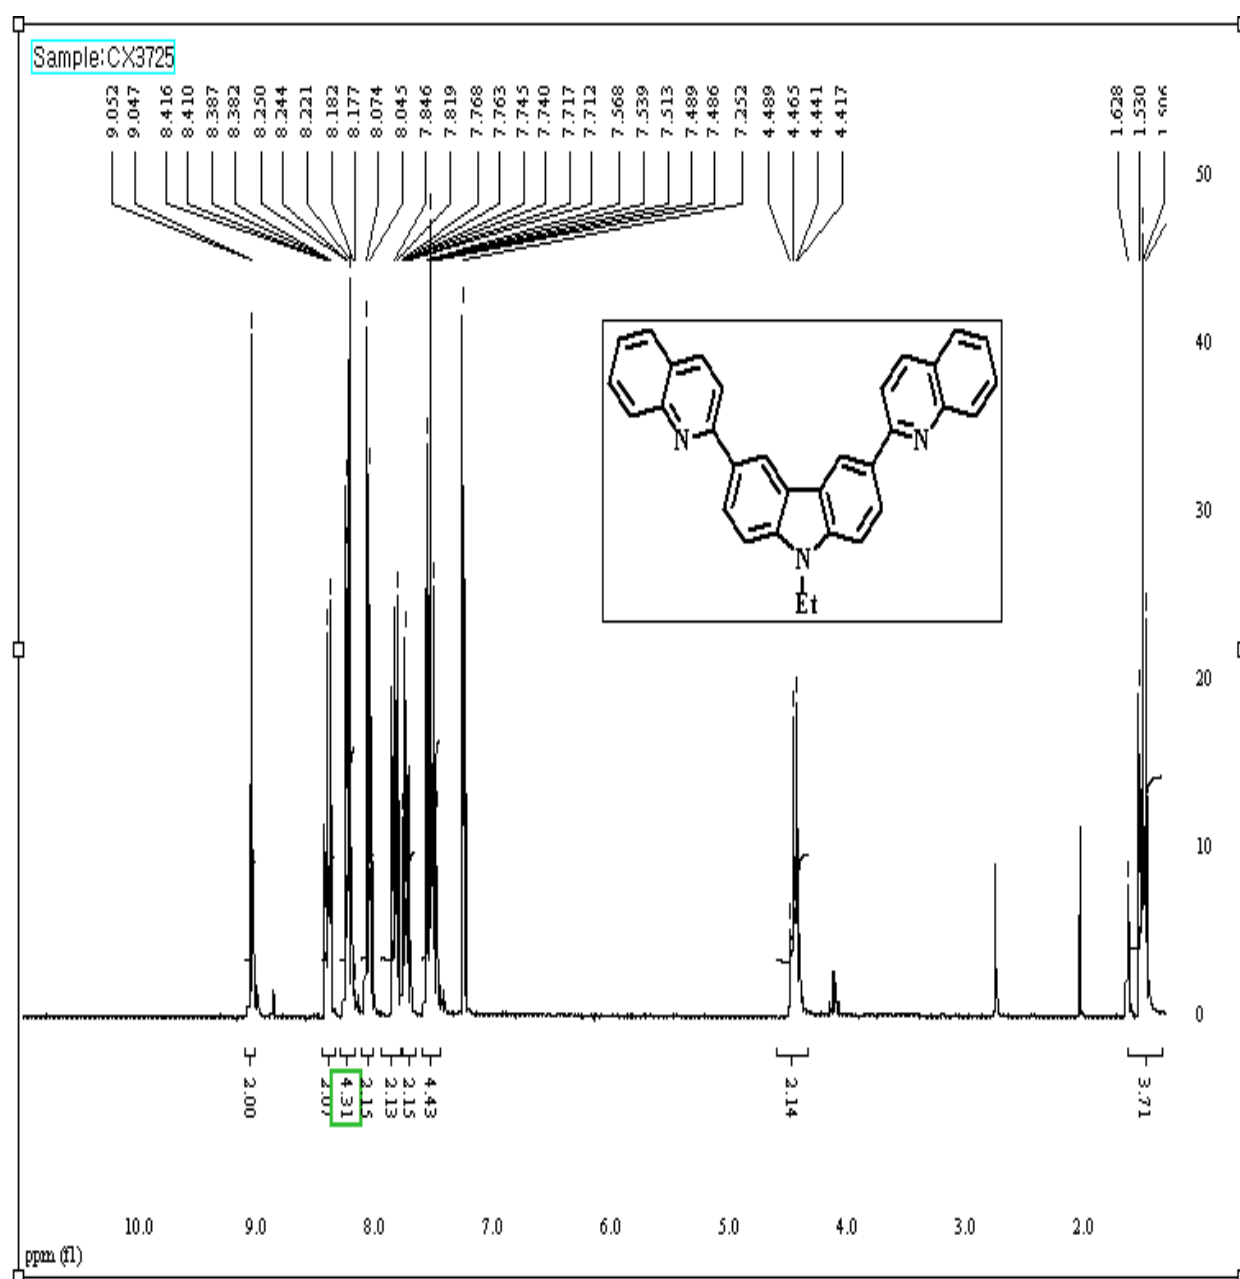

**Figure S4:**  $^1\text{H}$  NMR spectrum of **5a**.

Sample: CX5533

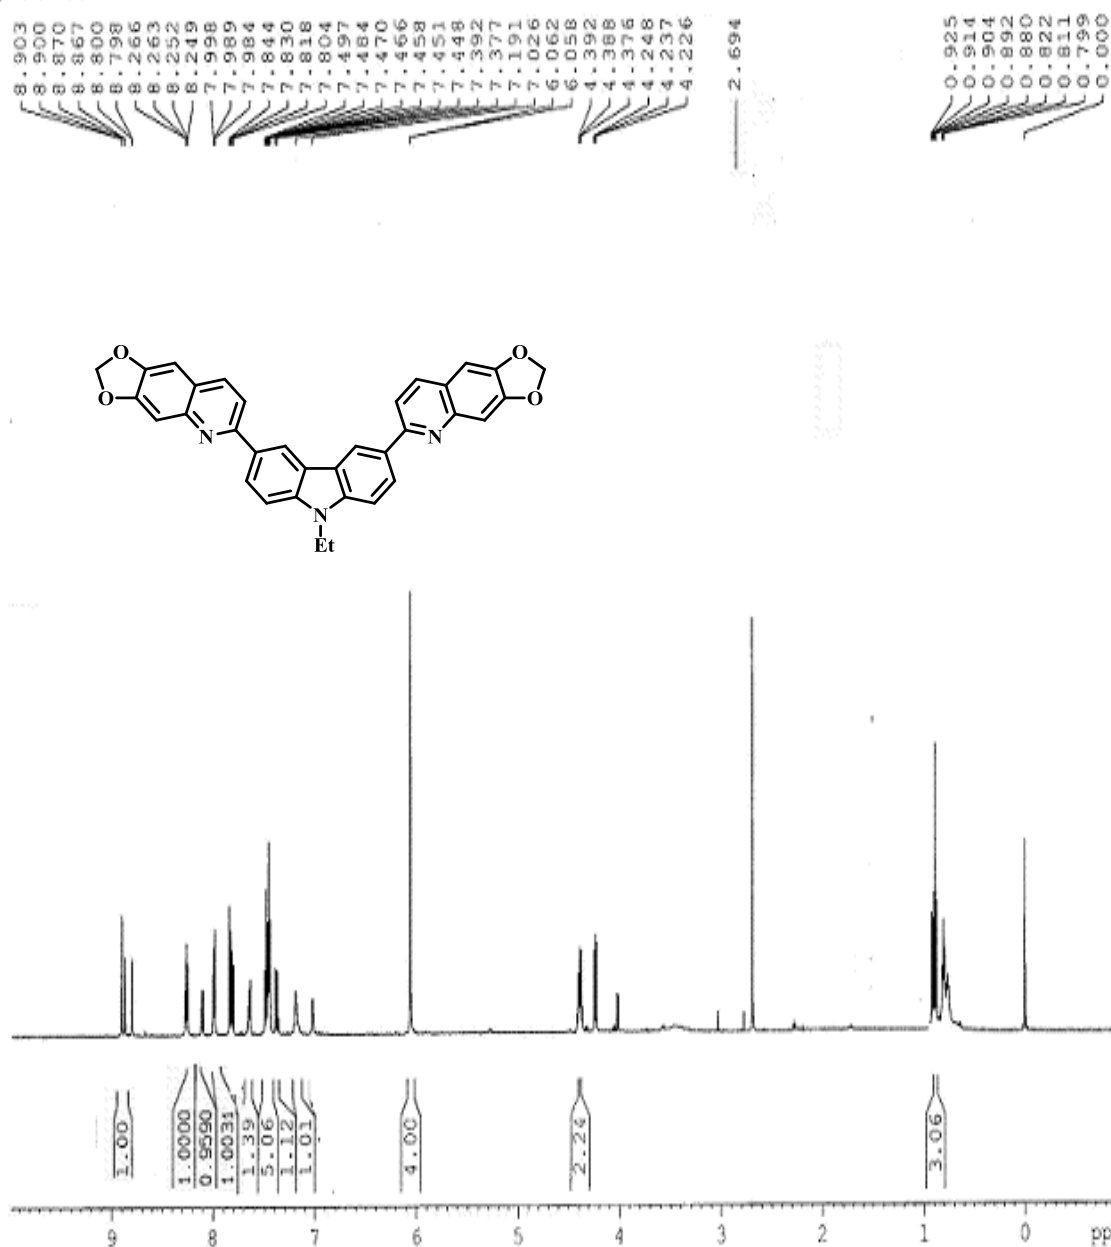

Figure S5: <sup>1</sup>H NMR spectrum of **5b**.
